# Supplementary material for: Analysis of a New Model of Economic Growth in Renewable Energy for Green Computing
Source: publisher site journal article supplement (doi:10.1515/econ-2022-0082), 2024-01-01
Supplement: Supplementary file 1 [file Reviews.pdf]

# Reviews of ECONJOURNAL-D-23-00199R2

Analysis of a New Model of Economic Growth in Renewable Energy for Green Computing

## Round 1

### Reviewer 1

It is good work and deserves appreciation; the contribution and motives are good, the method used is clear and up-to-date, and all the resources are up-to-date and relevant. However, the following concerns need to be resolved:

1. In the proposed section, the quality of the figures must be checked. Some figure's quality is very low or compromised. Figure quality should be improved.
2. In what manner does the model foster innovation within the computing industry while promoting environmental responsibility?
3. Are there any potential challenges, obstacles, or limitations to adopting this economic growth model?
4. By what means does the model align with global initiatives and agreements on sustainable development and renewable energy?
5. Deliberate economic indicators are utilized in this manuscript to measure the success and impact of this model?
6. Provide the key conclusions drawn from this new economic growth model's analysis to envision the future impact?
7. How does the model address potential social impacts, including equity issues and access to green technologies?
8. Is the economic growth model designed to be scalable for different contexts and adaptable to evolving technological landscapes?

### Reviewer 2

The manuscript proposed the Artificial Neural Network-enabled Economic Growth Model (ANN-EGM) to predict the restraining and push energy variables that impede economic growth. Authors need to reply point-to-point to my comments and improve the paper's quality according to the following suggestions:

1. The author is advised to provide conclusive experimental data expressed as a percentage of expected values in the abstract and conclusion sections.
2. The preliminary section should clearly include the limitations of the proposed ANN-EGM model's advantages and disadvantages.
3. Please provide a section discussing this ANN-EGM model's feasible/real application scenarios.
4. Add a brief background on energy consumption of renewable energy Kaggle dataset, and the reference cited is inappropriate.
5. The conclusion should be rewritten to succinctly summarize the main findings and their implications. Consider reinforcing the manuscript's contribution to the existing literature and its relevance to practitioners or policymakers.
6. Ensure all references cited in the text are included in the reference list and vice versa. Additionally, check the consistency and accuracy of citation styles throughout the manuscript.
7. The discussion section is well-structured, providing a thorough analysis of the findings. However, consider delving deeper into the implications of the results for the broader field and discussing potential limitations or areas for future research.
8. The proposed methodology section requires further elaboration. Providing details on the research design, data collection methods, and analytical tools will enhance the study's transparency and replicability.
9. The introduction section could be improved by citing some refs:
  - + Agarwal, Shivani, Sandhya Makkar, and Duc-Tan Tran, eds. Privacy vulnerabilities and data security challenges in the IoT. CRC Press, 2020.
  - + System Reliability, Quality Control, Safety, Maintenance and Management, Gunjan, V.K., Singh, S.N., Duc-Tan, T., Rincon Aponte, G.J., Kumar, 2019, Springer (Scopus Indexed).
  - + Govindaraj, R., Govindaraj, P., Chowdhury, S., Kim, D., Tran, D. T., & Le, A. N. (2021). A Review on Various Applications of Reputation Based Trust Management. International Journal of Interactive Mobile Technologies, 15(10).

## Reviewr 3

Please include any specific comments for the author concerning his/her manuscript. These comments will be sent to the author. Please use as much space as necessary. Please be as constructive as possible and include clear and specific suggestions stating which aspects of the manuscript must/should be improved, and your rationale.

I believe this work needs to be revised to ensure its quality and published in this journal.

- In the introduction, include the fundamental concept behind the new economic growth model in renewable energy for green computing?
- In what way does the proposed model integrate renewable energy sources into the economic growth framework?
- In addition, What are the key drivers influencing the adoption of this new economic growth model?
- Additionally, can you outline the main components of the model and their respective roles in promoting green computing?
- Besides, are there specific industries or sectors that stand to benefit the most from this economic growth model?
- Discuss the potential economic benefits for businesses and industries that adopt this green computing model?
- Moreover, what technological innovations are integral to the success of the proposed economic growth model?
- By what means can the model adapt to evolving technologies and changes in the renewable energy landscape?
- . I recommend adding the following papers on energy efficient to enrich the survey.

10.1109/ACCESS.2023.3273219

<https://doi.org/10.3389/fevo.2023.1132678>

<https://doi.org/10.1155/2022/2376353>

## Round 2

### Reviewer 1

a) After carefully reading this manuscript, the authors have responded to the comments satisfactorily. But still, there are some minor flaws, like tables needing to be cited correctly and advising authors to thoroughly proofread English before submitting the next revised file. This manuscript can be accepted after all these concerns are resolved. So, I suggest a minor revision that helps improve this manuscript's quality.

b) Ensure the most important concepts, such as "Renewable Energy" and "Green Computing," are prominently featured.

c) What are the anticipated long-term economic benefits and drawbacks of the proposed model for renewable energy in the context of green computing?

d) The introduction section could be improved by citing some refs:

- + Agarwal, Shivani, Sandhya Makkar, and Duc-Tan Tran, eds. Privacy vulnerabilities and data security challenges in the IoT. CRC Press, 2020.
- + System Reliability, Quality Control, Safety, Maintenance and Management, Gunjan, V.K., Singh, S.N., Duc-Tan, T., Rincon Aponte, G.J., Kumar, 2019, Springer (Scopus Indexed).
- + Govindaraj, R., Govindaraj, P., Chowdhury, S., Kim, D., Tran, D. T., & Le, A. N. (2021). A Review on Various Applications of Reputation Based Trust Management. International Journal of Interactive Mobile Technologies, 15(10).

### Reviewer 2

This paper investigated a significant problem for renewable energy for green computing. Basically, a generalized framework has been proposed. However, some details are unclear, and the following minor issues should be considered.

- Clarify the financing mechanisms or investment strategies recommended for supporting the implementation of the economic growth model?
- Specify the resilient and secure energy infrastructure in the context of green computing?
- Elucidate the collaboration between the public and private sectors in advancing renewable energy for green computing?
- How does the availability and efficiency of energy storage technologies impact the reliability of renewable energy sources?

## Round 3

### Reviewer 1

Appreciated the Modifications done

### Reviewer 2

I agreed with this revised version

### Reviewer 3

I am satisfied with the author's response, and hence, I recommend the paper be accepted.
